# Supplementary material for: Methamphetamine Enhances HIV-Induced Aberrant Proliferation of Neural Progenitor Cells via the FOXO3-Mediated Mechanism
Source: PubMed Central journal article supplement (PMC8599226; doi:10.1007/s12035-021-02407-9), 2021-05-13
Supplement: 12035_2021_2407_MOESM1_ESM.pdf [file 12035_2021_2407_MOESM1_ESM.pdf]

**Methamphetamine enhances HIV-induced aberrant proliferation of neural progenitor cells via  
the FOXO3-mediated mechanism**

Minseon Park<sup>1</sup>, William Baker<sup>1</sup>, Dilraj Cambow<sup>1</sup>, Danielle Gogerty<sup>1</sup>, Ana Rachel Leda<sup>1</sup>, Bridget Herlihy<sup>1</sup>,  
Darya Pavlenko<sup>1</sup>, Schuyler Van Den Nieuwenhuizen<sup>1</sup>, and Michal Toborek<sup>1,2</sup>

<sup>1</sup>Department of Biochemistry and Molecular Biology, Miller School of Medicine at University of Miami,  
Miami, FL 33136

<sup>2</sup>Laboratory of Molecular Biology, Faculty of Physiotherapy, The Jerzy Kukuczka Academy of Physical  
Education, Katowice 40-065, Poland

**SUPPLEMENTAL DATA**

**Table 1. Unique pathways identified by RNA seq in the brains of METH-treated mice vs the brains of METH-treated and EcoHIV-infected mice.**

| <b>Unique pathways in the brains of METH vs METH plus EcoHIV mice</b> |                           |           |             |
|-----------------------------------------------------------------------|---------------------------|-----------|-------------|
| <b>Total 152 pathways</b>                                             | <b>Total no. of genes</b> | <b>up</b> | <b>down</b> |
| activation of innate immune response                                  | 6                         | 4         | 2           |
| adherens junction                                                     | 13                        | 10        | 3           |
| AMPA glutamate receptor activity                                      | 2                         | 1         | 1           |
| AMPA glutamate receptor complex                                       | 6                         | 2         | 4           |
| anatomical structure formation involved in morphogenesis              | 17                        | 9         | 8           |
| anchoring junction                                                    | 14                        | 11        | 3           |
| Angiogenesis                                                          | 13                        | 7         | 6           |
| animal organ morphogenesis                                            | 17                        | 9         | 8           |
| anterograde trans-synaptic signaling                                  | 14                        | 6         | 8           |
| apoptotic process                                                     | 24                        | 14        | 10          |
| asymmetric synapse                                                    | 9                         | 4         | 5           |
| axon extension                                                        | 6                         | 4         | 2           |
| blood vessel development                                              | 17                        | 8         | 9           |
| blood vessel morphogenesis                                            | 16                        | 8         | 8           |
| cardiovascular system development                                     | 17                        | 8         | 9           |
| cell adhesion mediated by integrin                                    | 4                         | 4         | 0           |
| cell death                                                            | 25                        | 15        | 10          |
| cell migration                                                        | 22                        | 11        | 11          |
| cell motility                                                         | 22                        | 11        | 11          |
| cell projection organization                                          | 20                        | 13        | 7           |

|                                                            |           |           |           |
|------------------------------------------------------------|-----------|-----------|-----------|
| <b>cell proliferation</b>                                  | <b>26</b> | <b>15</b> | <b>11</b> |
| cell-cell signaling                                        | 24        | 11        | 13        |
| cellular response to biotic stimulus                       | 7         | 4         | 3         |
| channel activity                                           | 11        | 4         | 7         |
| chemical synaptic transmission                             | 14        | 6         | 8         |
| Chemotaxis                                                 | 11        | 8         | 3         |
| circulatory system development                             | 19        | 9         | 10        |
| comma-shaped body morphogenesis                            | 2         | 2         | 0         |
| enzyme linked receptor protein signaling pathway           | 17        | 11        | 6         |
| establishment of apical/basal cell polarity                | 3         | 0         | 3         |
| establishment of epithelial cell polarity                  | 3         | 1         | 2         |
| establishment of monopolar cell polarity                   | 4         | 1         | 3         |
| establishment or maintenance of monopolar cell polarity    | 5         | 1         | 4         |
| excitatory extracellular ligand-gated ion channel activity | 4         | 2         | 2         |
| external side of plasma membrane                           | 7         | 3         | 4         |
| extracellular ligand-gated ion channel activity            | 5         | 2         | 3         |
| extracellular-glutamate-gated ion channel activity         | 3         | 1         | 2         |
| focal adhesion                                             | 10        | 7         | 3         |
| gated channel activity                                     | 8         | 4         | 4         |
| generation of neurons                                      | 21        | 14        | 7         |
| gland morphogenesis                                        | 7         | 3         | 4         |
| glutamate receptor activity                                | 2         | 0         | 2         |
| glutamate receptor signaling pathway                       | 5         | 2         | 3         |
| glycosphingolipid binding                                  | 2         | 1         | 1         |
| Golgi apparatus                                            | 19        | 13        | 6         |
| Golgi apparatus part                                       | 12        | 8         | 4         |
| homeostasis of number of cells                             | 8         | 5         | 3         |
| Hypothetical Network for Drug Addiction                    | 4         | 1         | 3         |
| inflammatory response                                      | 13        | 6         | 7         |
| innate immune response                                     | 12        | 6         | 6         |
| innate immune response-activating signal transduction      | 6         | 4         | 2         |
| integral component of plasma membrane                      | 22        | 11        | 11        |
| integrin binding                                           | 6         | 4         | 2         |
| intrinsic component of plasma membrane                     | 23        | 12        | 11        |
| ion channel activity                                       | 10        | 4         | 6         |
| ionotropic glutamate receptor activity                     | 3         | 1         | 2         |
| ionotropic glutamate receptor signaling pathway            | 3         | 1         | 2         |
| kidney development                                         | 9         | 5         | 4         |
| leukocyte migration                                        | 8         | 3         | 5         |
| ligand-gated channel activity                              | 6         | 3         | 3         |
| ligand-gated ion channel activity                          | 6         | 3         | 3         |
| lipopolysaccharide-mediated signaling pathway              | 4         | 2         | 2         |
| localization of cell                                       | 22        | 11        | 11        |
| Locomotion                                                 | 24        | 11        | 13        |
| long-term synaptic potentiation                            | 4         | 2         | 2         |

|                                                                       |           |           |          |
|-----------------------------------------------------------------------|-----------|-----------|----------|
| morphogenesis of an epithelial sheet                                  | 4         | 1         | 3        |
| movement of cell or subcellular component                             | 26        | 13        | 13       |
| negative regulation of B cell activation                              | 4         | 1         | 3        |
| negative regulation of cell activation                                | 7         | 3         | 4        |
| <b>negative regulation of cell proliferation</b>                      | <b>13</b> | <b>7</b>  | <b>6</b> |
| negative regulation of leukocyte activation                           | 7         | 3         | 4        |
| negative regulation of lymphocyte activation                          | 6         | 3         | 3        |
| negative regulation of prostatic bud formation                        | 2         | 1         | 1        |
| negative regulation of toll-like receptor signaling pathway           | 3         | 1         | 2        |
| <b>neuron development</b>                                             | <b>18</b> | <b>12</b> | <b>6</b> |
| <b>neuron differentiation</b>                                         | <b>21</b> | <b>14</b> | <b>7</b> |
| neuron projection                                                     | 15        | 11        | 4        |
| neuron projection development                                         | 15        | 11        | 4        |
| neuron projection extension                                           | 6         | 4         | 2        |
| neurotransmitter receptor activity                                    | 5         | 2         | 3        |
| Nicotine addiction - Mus musculus (mouse)                             | 5         | 1         | 4        |
| passive transmembrane transporter activity                            | 11        | 4         | 7        |
| Pertussis - Mus musculus (mouse)                                      | 5         | 5         | 0        |
| positive regulation of cell adhesion                                  | 10        | 6         | 4        |
| positive regulation of cell communication                             | 26        | 13        | 13       |
| positive regulation of cell differentiation                           | 17        | 13        | 4        |
| positive regulation of cell morphogenesis involved in differentiation | 6         | 5         | 1        |
| positive regulation of cell proliferation                             | 16        | 11        | 5        |
| positive regulation of defense response                               | 8         | 4         | 4        |
| positive regulation of innate immune response                         | 7         | 4         | 3        |
| positive regulation of intracellular signal transduction              | 15        | 8         | 7        |
| positive regulation of JAK-STAT cascade                               | 5         | 4         | 1        |
| positive regulation of multicellular organismal process               | 24        | 15        | 9        |
| positive regulation of peptidyl-tyrosine phosphorylation              | 27        | 18        | 9        |
| positive regulation of protein kinase A signaling                     | 2         | 1         | 1        |
| positive regulation of protein kinase C activity                      | 2         | 0         | 2        |
| positive regulation of response to stimulus                           | 27        | 15        | 12       |
| positive regulation of signaling                                      | 26        | 13        | 13       |
| positive regulation of STAT cascade                                   | 5         | 4         | 1        |
| positive regulation of tyrosine phosphorylation of STAT protein       | 5         | 4         | 1        |
| positive regulation of tyrosine phosphorylation of Stat3 protein      | 3         | 3         | 0        |
| programmed cell death                                                 | 24        | 14        | 10       |
| protein kinase A signaling                                            | 3         | 1         | 2        |
| receptor binding                                                      | 22        | 13        | 9        |
| regulation of anatomical structure morphogenesis                      | 19        | 12        | 7        |
| regulation of axon extension                                          | 5         | 3         | 2        |
| regulation of cell adhesion                                           | 17        | 8         | 9        |
| <b>regulation of cell migration</b>                                   | <b>14</b> | <b>7</b>  | <b>7</b> |
| regulation of cell morphogenesis                                      | 11        | 9         | 2        |
| <b>regulation of cell morphogenesis involved in differentiation</b>   | <b>31</b> | <b>22</b> | <b>9</b> |

|                                                                            |           |           |           |
|----------------------------------------------------------------------------|-----------|-----------|-----------|
| <b>regulation of cell motility</b>                                         | <b>14</b> | <b>7</b>  | <b>7</b>  |
| <b>regulation of cell proliferation</b>                                    | <b>25</b> | <b>15</b> | <b>10</b> |
| regulation of cellular component movement                                  | 16        | 8         | 8         |
| regulation of cytokine production                                          | 12        | 4         | 8         |
| regulation of extent of cell growth                                        | 5         | 3         | 2         |
| regulation of innate immune response                                       | 7         | 4         | 3         |
| regulation of locomotion                                                   | 15        | 8         | 7         |
| regulation of mast cell activation involved in immune response             | 3         | 2         | 1         |
| regulation of mast cell degranulation                                      | 3         | 1         | 2         |
| regulation of multicellular organismal development                         | 34        | 25        | 9         |
| <b>regulation of neuron differentiation</b>                                | <b>12</b> | <b>10</b> | <b>2</b>  |
| regulation of peptidyl-tyrosine phosphorylation                            | 7         | 6         | 1         |
| regulation of postsynaptic membrane potential                              | 5         | 3         | 2         |
| regulation of prostatic bud formation                                      | 2         | 1         | 1         |
| regulation of protein kinase A signaling                                   | 3         | 1         | 2         |
| regulation of protein kinase C activity                                    | 2         | 0         | 2         |
| regulation of toll-like receptor signaling pathway                         | 4         | 2         | 2         |
| regulation of tyrosine phosphorylation of STAT protein                     | 5         | 4         | 1         |
| renal system development                                                   | 10        | 5         | 5         |
| response to external stimulus                                              | 27        | 14        | 13        |
| response to wounding                                                       | 12        | 5         | 7         |
| semaphorin receptor activity                                               | 3         | 3         | 0         |
| semaphorin receptor complex                                                | 2         | 2         | 0         |
| semaphorin-plexin signaling pathway involved in neuron projection guidance | 3         | 3         | 0         |
| side of membrane                                                           | 11        | 6         | 5         |
| S-shaped body morphogenesis                                                | 2         | 2         | 0         |
| substrate-specific channel activity                                        | 10        | 4         | 6         |
| sulfur compound binding                                                    | 7         | 2         | 5         |
| Synapse                                                                    | 24        | 14        | 10        |
| synapse part                                                               | 19        | 10        | 9         |
| synaptic signaling                                                         | 14        | 6         | 8         |
| tissue morphogenesis                                                       | 14        | 10        | 4         |
| tolerance induction                                                        | 3         | 1         | 2         |
| toll-like receptor signaling pathway                                       | 5         | 3         | 2         |
| transmembrane transport                                                    | 20        | 7         | 13        |
| transmembrane transporter activity                                         | 16        | 6         | 10        |
| transmitter-gated channel activity                                         | 4         | 2         | 2         |
| transmitter-gated ion channel activity                                     | 4         | 2         | 2         |
| trans-synaptic signaling                                                   | 14        | 6         | 8         |
| tyrosine phosphorylation of STAT protein                                   | 5         | 4         | 1         |
| urogenital system development                                              | 10        | 5         | 5         |
| vasculature development                                                    | 17        | 8         | 9         |

**Table 2. Unique pathways identified by RNA seq in the brains of control mice vs the brains of EcoHIV-infected mice.**

| <b>Unique pathways in the brains of the control vs EcoHIV mice</b> |                           |           |             |
|--------------------------------------------------------------------|---------------------------|-----------|-------------|
| <b>Total 23 pathways</b>                                           | <b>Total no. of genes</b> | <b>up</b> | <b>down</b> |
| actin cytoskeleton                                                 | 1                         | 7         | 2           |
| asymmetric synapse                                                 | 6                         | 2         | 1           |
| cell-cell junction                                                 | 3                         | 8         | 1           |
| cell-substrate junction                                            | 9                         | 10        | 2           |
| contractile fiber                                                  | 12                        | 3         | 2           |
| contractile fiber part                                             | 5                         | 3         | 4           |
| Cytoskeleton                                                       | 7                         | 17        | 4           |
| Enzyme linked receptor protein signaling pathway                   | 21                        | 13        | 0           |
| external encapsulating structure                                   | 13                        | 2         | 5           |
| extracellular matrix                                               | 7                         | 6         | 3           |
| extracellular matrix component                                     | 9                         | 1         | 2           |
| Focal adhesion                                                     | 4                         | 10        | 1           |
| Golgi membrane                                                     | 11                        | 7         | 2           |
| neurotransmitter receptor complex                                  | 9                         | 1         | 0           |
| nuclear outer membrane                                             | 1                         | 3         | 0           |
| Podosome                                                           | 3                         | 4         | 0           |
| Podosome assembly                                                  | 4                         | 4         | 0           |
| Prolactin signaling pathway - Mus musculus (mouse)                 | 4                         | 5         | 5           |
| proteinaceous extracellular matrix                                 | 10                        | 4         | 2           |
| regulation of establishment of T cell polarity                     | 1                         | 8         | 1           |
| Sarcoplasm                                                         | 4                         | 3         | 1           |
| sarcoplasmic reticulum                                             | 3                         | 2         | 1           |
| single-organism cellular localization                              | 17                        | 12        | 5           |

**Table 3. Unique pathways identified by RNA seq in the brains of EcoHIV-infected mice vs the brains of METH-treated and EcoHIV-infected mice.**

| <b>Unique pathways in the brains of EcoHIV vs. METH plus EcoHIV mice</b> |                           |           |             |
|--------------------------------------------------------------------------|---------------------------|-----------|-------------|
| <b>Total 3 pathways</b>                                                  | <b>Total no. of genes</b> | <b>up</b> | <b>down</b> |
| cell projection part                                                     | 6                         | 1         | 5           |
| filopodium membrane                                                      | 2                         | 1         | 1           |
| plasma membrane region                                                   | 7                         | 1         | 6           |

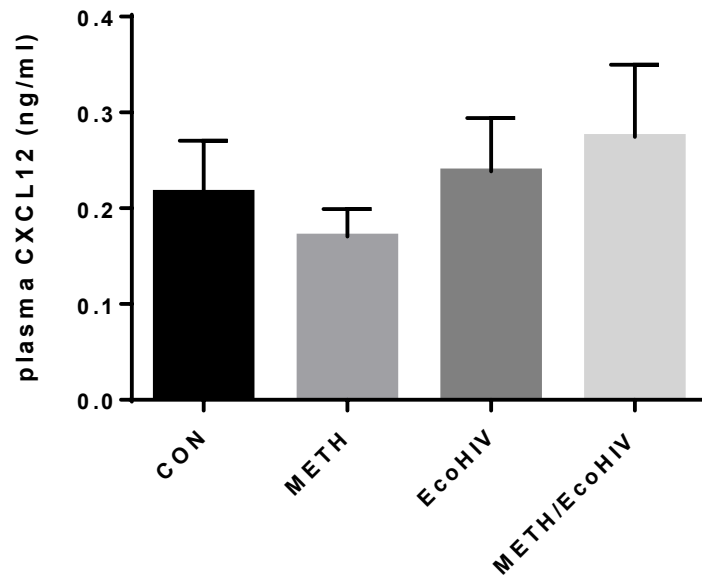

**Supplemental Fig. 1.** Concentration of CXCL12 in the mouse plasma. Plasma was collected from the experimental animals which were prepared as in Material and Method section. A Mouse CXCL12/SDF-1 alpha Quantikine ELISA kit from R&D system was used for measuring plasma level of CXCL12. N= 5~13 per group; One-way ANOVA.

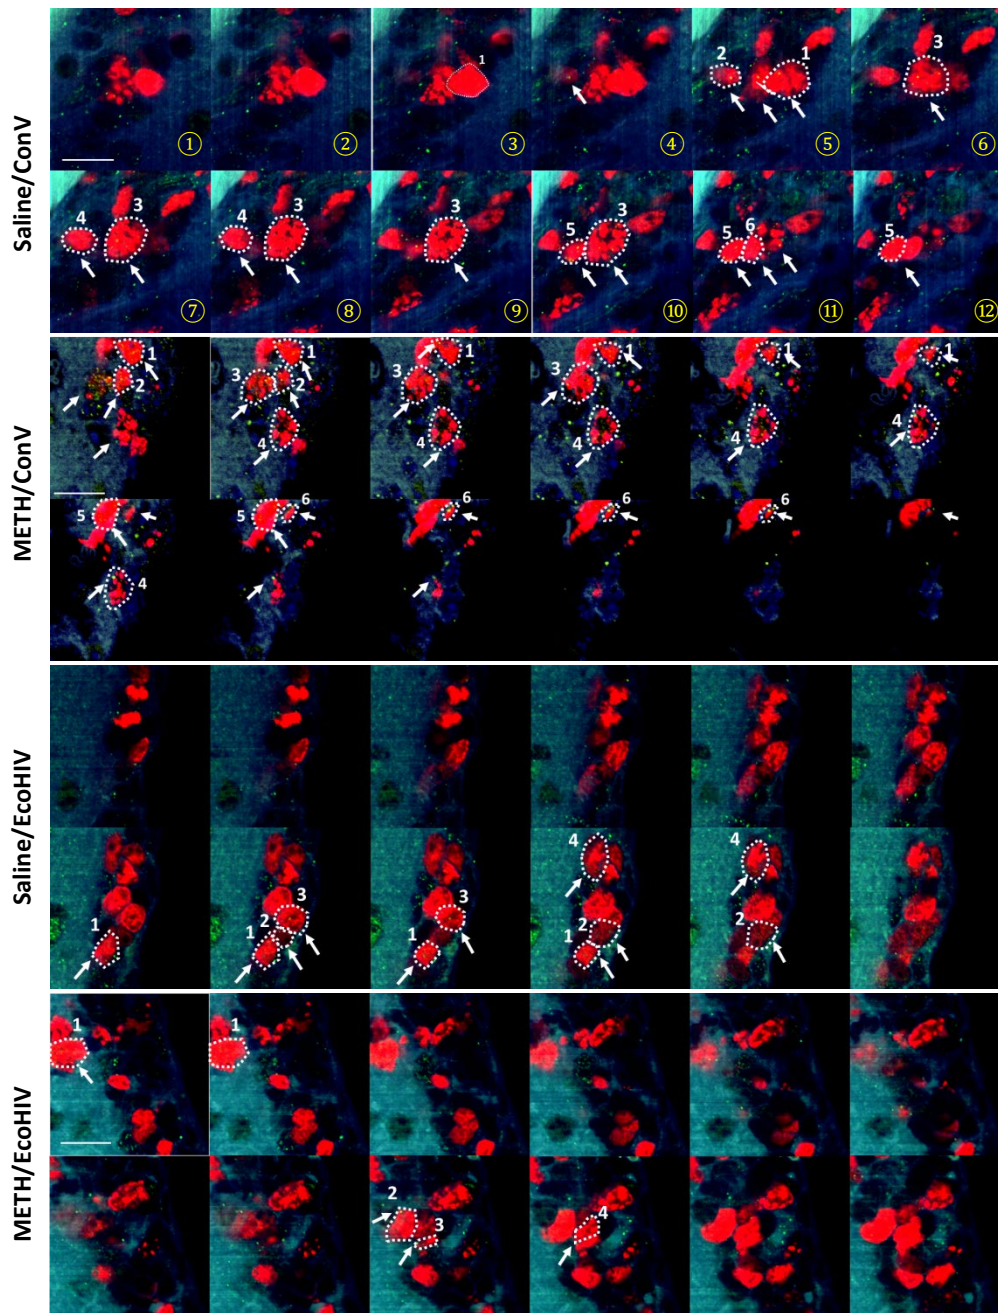

**Supplemental Fig. 2.** Consecutive Z-stack images of FOXO3 and Sox2-immunostained NPCs in SVZ are. Arrows point out the Sox2-positive nuclei (red) expressing FOXO3 immunoreactivity (green). FOXO3 was expressed by approximately 60% of Sox2-positive cells in the Saline/ConV group and by approximately 70% in the METH/ConV group. Infection by EcoHIV reduced these values; indeed, only ~50% cells from saline/EcoHIV group and ~31% cells from the METH/EcoHIV group expressed FOXO3 in the nuclei, suggesting FOXO3 sequestration in the cytoplasm; the effect that was also observed in human NPC exposed to METH and HIV.
